# Supplementary material for: Technical note: A new automated radiolarian image acquisition, stacking, processing, segmentation and identification workflow
Source: Copernicus journal article supplement (doi:10.5194/cp-16-2415-2020), 2020-12-02
Supplement: Supplementary file 1 [file cp-16-2415-2020-supplement.zip]

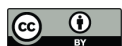

## *Supplement of*

# **Technical note: A new automated radiolarian image acquisition, stacking, processing, segmentation and identification workflow**

**Martin Tetard et al.**

*Correspondence to:* Martin Tetard ([tetard.martin@gmail.com](mailto:tetard.martin@gmail.com))

- cp-16-2415-2020-supplement-title-page.pdf
- Supplement
  - .DS\_Store
  - Figure S1.pdf
  - TableS1.xlsx
  - TableS2.xlsx
- \_\_MACOSX
  - Supplement
    - \* .\_DS\_Store
    - \* .\_Figure S1.pdf
    - \* .\_TableS1.xlsx
    - \* .\_TableS2.xlsx

The copyright of individual parts of the supplement might differ from the CC BY 4.0 License.
