# Supplementary material for: Technical note: A new automated radiolarian image acquisition, stacking, processing, segmentation and identification workflow
Source: Copernicus journal article supplement (doi:10.5194/cp-16-2415-2020), 2020-12-02
Supplement: Supplementary file 3 [file cp-16-2415-2020-supplement.zip]

Archive with 12 entries (9 files):
- Supplement/
- Supplement/.DS_Store
- Supplement/Figure S1.pdf
- Supplement/TableS1.xlsx
- Supplement/TableS2.xlsx
- __MACOSX/
- __MACOSX/Supplement/
- __MACOSX/Supplement/._.DS_Store
- __MACOSX/Supplement/._TableS1.xlsx
- __MACOSX/Supplement/._Figure S1.pdf
- __MACOSX/Supplement/._TableS2.xlsx
- cp-16-2415-2020-supplement-title-page.pdf
