# Supplementary material for: Technical note: A new automated radiolarian image acquisition, stacking, processing, segmentation and identification workflow
Source: Copernicus journal article supplement (doi:10.5194/cp-16-2415-2020), 2020-12-02
Supplement: Supplementary file 3 [file cp-16-2415-2020-supplement.zip › Supplement/Figure S1.pdf]

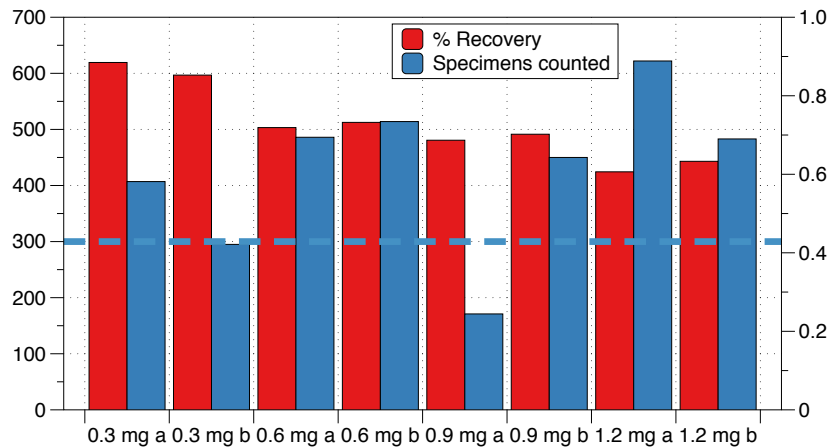

**Figure S1.** Number of specimens counted and % for different weight of radiolarian material drop in the decanter (tested on a set of random samples from Core MD97-2140, from the West Pacific Warm Pool). The dashed blue line corresponds to the minimum counts required per sample (300 specimens).

**Table S1.** Excel spreadsheet showing the confusion matrix (corresponding to Fig. 4) that can easily be scrolled and zoomed in.

**Table S2.** Summary table containing the number of images in the test set, recall score, and main misclassified classes, for each class of the confusion matrix.
