# Supplementary material for: Technical note: A new automated radiolarian image acquisition, stacking, processing, segmentation and identification workflow
Source: Copernicus journal article supplement (doi:10.5194/cp-16-2415-2020), 2020-12-02
Supplement: Supplementary file 3 [file cp-16-2415-2020-supplement.zip › Supplement/TableS2.xlsx]

## Sheet: Feuil1
Family name	Class name	Number of images in the class test set	Recall score	Examples of missclassified classes (according to their confusion score)
				Class	Score	Class	Score	Class	Score
Actinommidae	Actinomma henningsmoeni leptodermum	11	73 %	Hexacontium spp	9 %	Thecosphaera inermis	9 %	Dydimocyrtis antepenultima laticonus penultima	9 %
	Actinomma sol Cenosphaera spp	65	89 %	Druppatractus irregularis	3 %	Stylatractus universus	2 %	Heliodiscus asteriscus	2 %
	Amphistylus angelinus	4	75 %	Axoprunum monostylum	25 %
	Axoprunum acquilonium	5	20 %	Stylatractus neptunus	40 %	Actinomma sol Cenosphaera spp	20 %	Hexacontium spp	20 %
	Axoprunum monostylum	6	50 %	Amphistylus angelinus	50 %
	Carposphaera acanthophora Cenosphaera coronata	13	69 %	Actinomma henningsmoeni leptodermum	8 %	Actinomma sol Cenosphaera spp	8 %	Stylatractus neptunus	8 %
	Druppatractus irregularis	30	83 %	Amphistylus angelinus	3 %	Axoprunum monostylum	3 %	Thecosphaera inermis	3 %
	Hexacontium spp	24	83 %	Actinomma henningsmoeni leptodermum	4 %	Stylosphaera melpomene	4 %	Dydimocyrtis tetrathalamus tetrathalamus	4 %
	Stylatractus neptunus	30	93 %	Stylatractus santaeannae	7 %
	Stylatractus santaeannae	9	100 %
	Stylatractus universus	4	50 %	Axoprunum monostylum	50 %
	Stylosphaera melpomene	3	0 %	Actinomma henningsmoeni leptodermum	33 %	Dydimocyrtis tetrathalamus tetrathalamus	33 %	Heliodiscus asteriscus	33 %
	Stylosphaera sp	9	78 %	Stylatractus santaeannae	11 %	pylonioid spp	11 %
	Thecosphaera inermis	6	50 %	Actinomma sol Cenosphaera spp	17 %	Larcopyle butschlii weddellium group	17 %	other	17 %
Coccodiscidae	Diartus hughesi petterssoni	18	83 %	Dydimocyrtis antepenultima laticonus penultima	11 %	Amphirhopalum ypsilon	6 %
	Dydimocyrtis antepenultima laticonus penultima	50	96 %	Dydimocyrtis tetrathalamus tetrathalamus	2 %	Stichocorys johnsoni	2 %
	Dydimocyrtis tetrathalamus tetrathalamus	97	91 %	Dydimocyrtis antepenultima laticonus penultima	3 %	broken	3 %	pylonioid spp	1 %
	Sethodiscus macrococcus	13	62 %	broken	15 %	Larcospira quadrangula group	8 %	Tetrapyle octacantha group	8 %
Heliodiscidae	Heliodiscus asteriscus	23	100 %
Lithelidae	Larcopyle butschlii weddellium group	127	84 %	Porodiscus sp	4 %	Lithelius minor	2 %	pylonioid spp	2 %
	Larcospira quadrangula group	34	79 %	Sethodiscus macrococcus	9 %	pylonioid spp	6 %	Heliodiscus asteriscus	3 %
	Lithelius minor	44	91 %	Larcopyle butschlii weddellium group	5 %	Stylodictya multispina tenuispina	2 %	double	2 %
	Lithelius nautiloides klingi	2	50 %	Lithelius minor	50 %
	Prunopyle titan	2	100 %
Pyloniidae	Hexapyle dodecantha	5	40 %	pylonioid spp	40 %	Tetrapyle octacantha group	20 %
	Tetrapyle octacantha group	226	95 %	pylonioid spp	3 %	Larcospira quadrangula group	1 %
	pylonioid spp	136	83 %	Tetrapyle octacantha group	6 %	Larcopyle butschlii weddellium group	4 %	broken	4 %
Spongodiscidae	Amphirhopalum ypsilon	6	33 %	Euchitonia elegans	33 %	broken	33 %
	Dictyocoryne profunda truncatum group	84	94 %	Euchitonia elegans	2 %	Larcopyle butschlii weddellium group	1 %	Spongodiscus resurgens biconcavus	1 %
	Euchitonia elegans	69	99 %	Dictyocoryne profunda truncatum group	1 %
	Porodiscus sp	78	85 %	Lithelius minor	5 %	Spongodiscus resurgens biconcavus	3 %	Larcopyle butschlii weddellium group	3 %
	Spongaster tetras	36	75 %	Dictyocoryne profunda truncatum group	11 %	Spongodiscus resurgens biconcavus	11 %	particles	3 %
	Spongodiscus resurgens biconcavus	133	93 %	Dictyocoryne profunda truncatum group	2 %	Porodiscus sp	2 %	Spongaster tetras	2 %
	Spongodiscus spp. B group	56	88 %	Porodiscus sp	5 %	Spongodiscus resurgens biconcavus	4 %	broken	4 %
	Spongurus cylindricus	8	100 %
	Stylochlamydium asteriscus (4)	4	50 %	Stylodictya multispina tenuispina	50 %
	Stylodictya acuelata	12	75 %	Stylodictya multispina tenuispina	17 %	Lithelius minor	8 %
	Stylodictya multispina tenuispina	94	89 %	Porodiscus sp	6 %	Spongodiscus resurgens biconcavus	2 %	Larcopyle butschlii weddellium group	1 %
	indet spA	12	75 %	broken	17 %	Euchitonia elegans	8 %
	indet spE	3	67 %	indet spA	33 %
Artostrobiidae	Botryostrobus aquilonaris	47	94 %	Siphocampe arachnea lineata	4 %	broken	2 %
	Botryostrobus auritus australis	32	100 %
	Phormostichoartus corbula	6	67 %	Botryostrobus aquilonaris	17 %	Theocorys veneris	17 %
	Phormostichoartus doliolum	4	100 %
	Phormostichoartus fistula pitomorphus	3	67 %	Botryostrobus aquilonaris	33 %
	Siphocampe arachnea lineata	8	88 %	other	12 %
Cannobotryidae	Acrobotrys chelinobotrys	5	100 %
	Acrobotrys disolenia tritubus	3	67 %	double	33 %
	Botryocyrtis elongatum quinaria scutum	76	96 %	Larcopyle butschlii weddellium group	3 %	broken	1 %
Carpocaniidae	Carpocanistrum spp	60	93 %	Druppatractus irregularis	2 %	Pterocorys spp	2 %	Stichocorys delmontensis peregrina	2 %
Collozoidae	Acrosphaera cyrtodon hamospina	42	83 %	Acrosphaera spinosa	7 %	Solenosphaera zanguebarica Trisolenia megalactis	7 %	Siphonosphaera sp A	2 %
	Acrosphaera murrayana	2	50 %	Collosphaera huxleyi brattstroemi	50 %
	Acrosphaera spinosa	33	94 %	Acrosphaera cyrtodon hamospina	6 %
	Collosphaera huxleyi brattstroemi	23	87 %	Solenosphaera zanguebarica Trisolenia megalactis	13 %
	Collosphaera macropora	15	93 %	Siphonosphaera martensi	7 %
	Collosphaera pyloma	2	100 %
	Collosphaera sp	3	67 %	Collosphaera huxleyi brattstroemi	33 %
	Collosphaera tuberosa	2	100 %
	Siphonosphaera martensi	6	83 %	Siphonosphaera sp A	17 %
	Siphonosphaera polysiphonia	9	89 %	Theocorys veneris	11 %
	Siphonosphaera sp A	7	86 %	Collosphaera huxleyi brattstroemi	14 %
	Solenosphaera chierchiae	2	100 %
	Solenosphaera omnitubus	43	100 %
	Solenosphaera zanguebarica Trisolenia megalactis	44	91 %	Acrosphaera cyrtodon hamospina	5 %	Solenosphaera omnitubus	2 %	broken	2 %
Plagiacanthidae	Clathrocanium coarctatum	2	50 %	Peromelissa phalacra	50 %
	Pseudodictyophimus gracilipes	9	67 %	Cycladophora bicornis davisiana	11 %	Pterocanium trilobum	11 %	spicule	11 %
	Lophophaena hispida	20	75 %	Tetrapyle octacantha group	10 %	pylonioid spp	5 %	Dydimocyrtis tetrathalamus tetrathalamus	5 %
	Peromelissa phalacra	54	93 %	Lophophaena hispida	2 %	Collosphaera huxleyi brattstroemi	2 %	indet spA	2 %
Pterocorythidae	Anthocyrtidium ehrenberghi pliocenica zanguebaricum	3	33 %	Anthocyrtidium ophirense	67 %
	Anthocyrtidium ophirense	4	75 %	Lamprocyrtis hannai	25 %
	Lamprocyclas maritalis	10	100 %
	Lamprocyrtis hannai	9	78 %	Lamprocyclas maritalis	11 %	Cycladophora bicornis davisiana	11 %
	Pterocorys spp	25	100 %
	Theocorythium trachelium	10	100 %
Theoperidae	Cornutella profunda	43	98 %	broken	2 %
	Cycladophora bicornis davisiana	21	90 %	Dictyophimus hirundo crisae	5 %	Lamprocyrtis hannai	5 %
	Cycladophora cornutoides	7	57 %	Cycladophora bicornis davisiana	29 %	other	14 %
	Dictyocephalus papillosum	21	100 %
	Dictyophimus hirundo crisae	6	83 %	Cycladophora cornutoides	17 %
	Dictyophimus killmari	3	67 %	Acrosphaera cyrtodon hamospina	33 %
	Dictyophimus splendens	5	60 %	Cornutella profunda	20 %	Cycladophora cornutoides	20 %
	Eucecryphalus sestrodiscus	8	75 %	Solenosphaera zanguebarica Trisolenia megalactis	12 %	broken	12 %
	Eucyrtidium acuminatum hexagonatum	20	90 %	Pterocorys spp	5 %	Phormostichoartus corbula	5 %
	Peripyramis circumtexta	8	75 %	Dictyophimus hirundo crisae	12 %	Cycladophora bicornis davisiana	12 %
	Pterocanium praetextum	11	91 %	Pterocanium trilobum	9 %
	Pterocanium trilobum	8	100 %
	Stichocorys delmontensis peregrina	82	100 %
	Stichocorys johnsoni	12	100 %
	Theocorys veneris	8	75 %	Acrobotrys chelinobotrys	12 %	other	12 %
Trissocyclidae	Acanthodesmia vinculata	22	95 %	Lophospyris pentagona pentagona	5 %
	Amphispyris reticulata	4	75 %	Lophospyris pentagona group	25 %
	Liriospyris parkerae	2	50 %	other	50 %
	Lophospyris pentagona group	19	95 %	Tholospyris baconiana	5 %
	Lophospyris pentagona pentagona	6	100 %
	Phormospyris stabilis group	10	100 %
	Phormospyris stabilis scaphites	14	93 %	Peromelissa phalacra	7 %
	Tholospyris baconiana	6	67 %	Phormospyris stabilis scaphites	33 %
	Tholospyris sp	141	98 %	Acanthodesmia vinculata	1 %	broken	1 %
	Tympanidium binoctonum	5	40 %	Lophospyris pentagona group	60 %
	Zygocircus productus	17	100 %
	background	223	97 %	particles	2 %
	broken	218	77 %	particles	3 %	pylonioid spp	2 %	double	1 %
	bubble	198	100 %
	diatom	77	94 %	porous fragments	1 %	background	1 %	broken	1 %
	double	209	79 %	broken	4 %	Dydimocyrtis tetrathalamus tetrathalamus	3 %	Tetrapyle octacantha group	2 %
	particles	265	95 %	porous fragments	1 %	spicule	1 %	broken	1 %
	porous fragments	230	97 %	spicule	1 %	particles	1 %	broken	1 %
	spicule	183	98 %	particles	1 %	broken	1 %
	other	24	33 %	broken	8 %	Stichocorys johnsoni	8 %	Dydimocyrtis antepenultima laticonus penultima	8 %
